# Supplementary material for: Facile synthesis of nickel–cobalt sulfide/reduced graphene oxide hybrid with enhanced capacitive performance
Source: Royal Society of Chemistry journal article supplement (doi:10.1039/c5ra09447j), 2015-01-01
Supplement: c5ra09447j1.pdf [file c5ra09447j1.pdf]

Supplementary data for

**Facile synthesis of nickel-cobalt sulfide/reduced graphene oxide  
hybrid with enhanced capacitive performance**

*Xiaoqing Cai, Xiaoping Shen, \* Lianbo Ma, Zhenyuan Ji, and Lirong kong*

*School of Chemistry and Chemical Engineering, Jiangsu University, Zhenjiang*

*212013, People's Republic of China*

---

\* Corresponding author. Tel/Fax: +86-511-88791800.

E-mail address: [xiaopingshen@163.com](mailto:xiaopingshen@163.com) (Xiaoping Shen).

Supporting Information

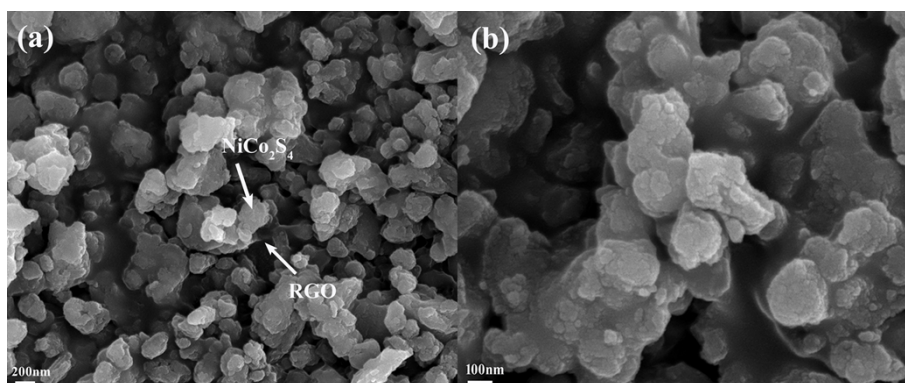

**Fig. S1** FESEM images of NiCo<sub>2</sub>S<sub>4</sub>/RGO-3 hybrid.

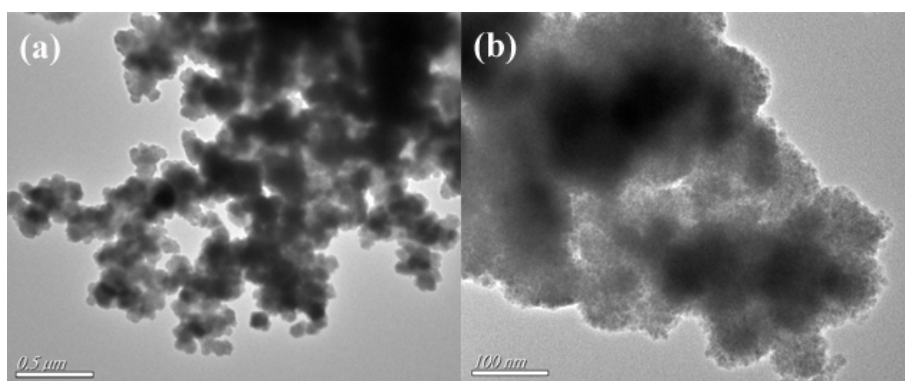

**Fig. S2** TEM images of pure NiCo<sub>2</sub>S<sub>4</sub> sample.

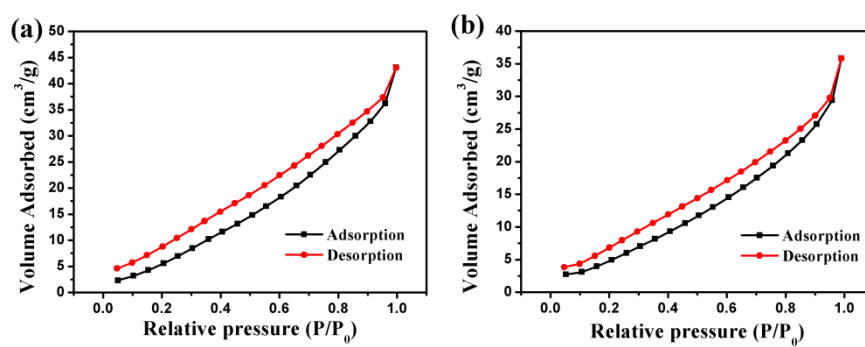

**Fig. S3** Nitrogen adsorption and desorption isotherms of (a) NiCo<sub>2</sub>S<sub>4</sub>/RGO-3 hybrid and (b) NiCo<sub>2</sub>S<sub>4</sub>.

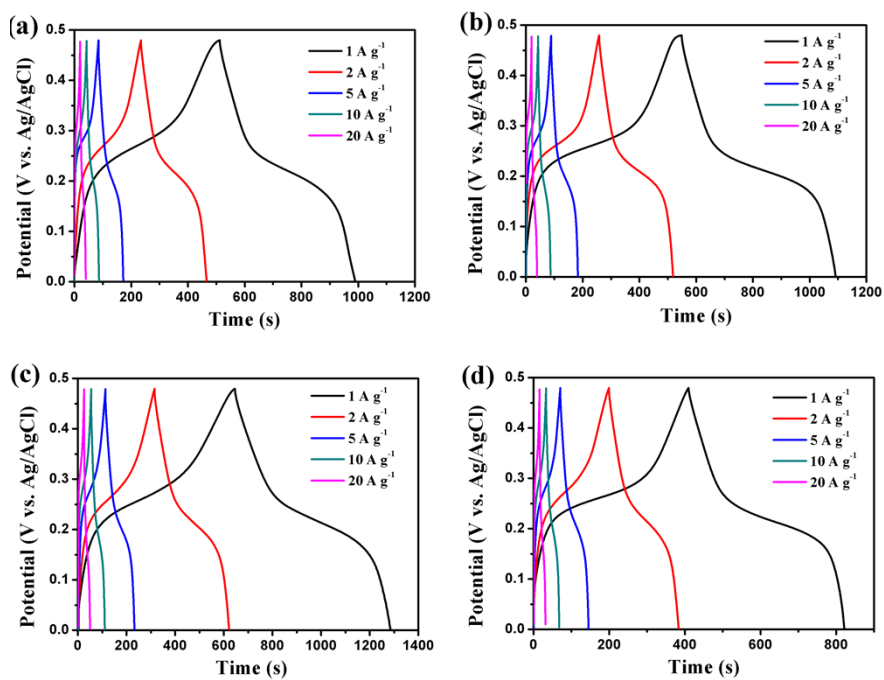

**Fig. S4** Charge-discharge curves of (a) NiCo<sub>2</sub>S<sub>4</sub>/RGO-1, (b) NiCo<sub>2</sub>S<sub>4</sub>/RGO-2, (c) NiCo<sub>2</sub>S<sub>4</sub>/RGO-4, (d) NiCo<sub>2</sub>S<sub>4</sub> electrodes at various current densities of 1.0, 2.0, 5.0, 10 and 20 A g<sup>-1</sup>.
